# Supplementary material
Source: publisher site journal article supplement (https://bdj.pensoft.net/lib/ajax_srv/article_elements_srv.php?action=download_suppl_file&instance_id=750272)
Supplement: Supplementary file [file article_elements_srv.php]

Jun 1, 2011 - Jun 1, 2012

# Language

All Sessions  
100.00%

+ Add Segment

**Explorer**

Summary

| Language                   | Acquisition                                                            |                                                              |                                                                | Behavior                                                     |                                                            |                                                              | Conversions                                                |                                                  |                                                            |
|----------------------------|------------------------------------------------------------------------|--------------------------------------------------------------|----------------------------------------------------------------|--------------------------------------------------------------|------------------------------------------------------------|--------------------------------------------------------------|------------------------------------------------------------|--------------------------------------------------|------------------------------------------------------------|
|                            | Sessions                                                               | % New Sessions                                               | New Users                                                      | Bounce Rate                                                  | Pages / Session                                            | Avg. Session Duration                                        | Goal Conversion Rate                                       | Goal Completions                                 | Goal Value                                                 |
|                            | <b>1,544,270</b><br><small>% of Total: 100.00%<br/>(1,544,270)</small> | <b>30.60%</b><br><small>Site Avg: 30.54%<br/>(0.17%)</small> | <b>472,479</b><br><small>% of Total: 100.17% (471,694)</small> | <b>34.36%</b><br><small>Site Avg: 34.36%<br/>(0.00%)</small> | <b>12.00</b><br><small>Site Avg: 12.00<br/>(0.00%)</small> | <b>00:12:08</b><br><small>Site Avg: 00:12:08 (0.00%)</small> | <b>0.00%</b><br><small>Site Avg: 0.00%<br/>(0.00%)</small> | <b>0</b><br><small>% of Total: 0.00% (0)</small> | <b>\$0.00</b><br><small>% of Total: 0.00% (\$0.00)</small> |
| 1. <a href="#">en-us</a>   | <b>545,540</b> (35.33%)                                                | 32.48%                                                       | 177,190 (37.50%)                                               | 37.76%                                                       | 12.24                                                      | 00:11:32                                                     | 0.00%                                                      | 0 (0.00%)                                        | \$0.00 (0.00%)                                             |
| 2. <a href="#">es</a>      | <b>260,751</b> (16.89%)                                                | 28.12%                                                       | 73,331 (15.52%)                                                | 26.59%                                                       | 14.51                                                      | 00:14:53                                                     | 0.00%                                                      | 0 (0.00%)                                        | \$0.00 (0.00%)                                             |
| 3. <a href="#">pt-br</a>   | <b>185,924</b> (12.04%)                                                | 26.74%                                                       | 49,722 (10.52%)                                                | 26.02%                                                       | 11.00                                                      | 00:12:23                                                     | 0.00%                                                      | 0 (0.00%)                                        | \$0.00 (0.00%)                                             |
| 4. <a href="#">es-es</a>   | <b>121,417</b> (7.86%)                                                 | 27.23%                                                       | 33,067 (7.00%)                                                 | 42.45%                                                       | 11.96                                                      | 00:11:55                                                     | 0.00%                                                      | 0 (0.00%)                                        | \$0.00 (0.00%)                                             |
| 5. <a href="#">fr</a>      | <b>84,517</b> (5.47%)                                                  | 27.69%                                                       | 23,399 (4.95%)                                                 | 26.97%                                                       | 14.84                                                      | 00:16:41                                                     | 0.00%                                                      | 0 (0.00%)                                        | \$0.00 (0.00%)                                             |
| 6. <a href="#">de</a>      | <b>36,752</b> (2.38%)                                                  | 34.06%                                                       | 12,519 (2.65%)                                                 | 38.44%                                                       | 8.35                                                       | 00:10:13                                                     | 0.00%                                                      | 0 (0.00%)                                        | \$0.00 (0.00%)                                             |
| 7. <a href="#">en-gb</a>   | <b>34,354</b> (2.22%)                                                  | 31.21%                                                       | 10,723 (2.27%)                                                 | 36.28%                                                       | 8.66                                                       | 00:09:06                                                     | 0.00%                                                      | 0 (0.00%)                                        | \$0.00 (0.00%)                                             |
| 8. <a href="#">de-de</a>   | <b>30,842</b> (2.00%)                                                  | 35.47%                                                       | 10,939 (2.32%)                                                 | 39.77%                                                       | 8.35                                                       | 00:08:53                                                     | 0.00%                                                      | 0 (0.00%)                                        | \$0.00 (0.00%)                                             |
| 9. <a href="#">zh-cn</a>   | <b>27,562</b> (1.78%)                                                  | 25.25%                                                       | 6,959 (1.47%)                                                  | 23.97%                                                       | 14.09                                                      | 00:15:17                                                     | 0.00%                                                      | 0 (0.00%)                                        | \$0.00 (0.00%)                                             |
| 10. <a href="#">es-419</a> | <b>17,663</b> (1.14%)                                                  | 27.76%                                                       | 4,904 (1.04%)                                                  | 26.01%                                                       | 13.43                                                      | 00:14:01                                                     | 0.00%                                                      | 0 (0.00%)                                        | \$0.00 (0.00%)                                             |
| 11. <a href="#">zh-tw</a>  | <b>15,058</b> (0.98%)                                                  | 21.88%                                                       | 3,295 (0.70%)                                                  | 36.66%                                                       | 7.25                                                       | 00:09:20                                                     | 0.00%                                                      | 0 (0.00%)                                        | \$0.00 (0.00%)                                             |
| 12. <a href="#">en</a>     | <b>14,698</b> (0.95%)                                                  | 43.22%                                                       | 6,352 (1.34%)                                                  | 53.97%                                                       | 7.11                                                       | 00:07:01                                                     | 0.00%                                                      | 0 (0.00%)                                        | \$0.00 (0.00%)                                             |
| 13. <a href="#">ru</a>     | <b>14,561</b> (0.94%)                                                  | 36.12%                                                       | 5,260 (1.11%)                                                  | 45.04%                                                       | 6.67                                                       | 00:06:35                                                     | 0.00%                                                      | 0 (0.00%)                                        | \$0.00 (0.00%)                                             |
| 14. <a href="#">ja</a>     | <b>13,338</b> (0.86%)                                                  | 29.30%                                                       | 3,908 (0.83%)                                                  | 32.21%                                                       | 13.72                                                      | 00:09:34                                                     | 0.00%                                                      | 0 (0.00%)                                        | \$0.00 (0.00%)                                             |
| 15. <a href="#">es-mx</a>  | <b>12,397</b> (0.80%)                                                  | 27.01%                                                       | 3,349 (0.71%)                                                  | 19.55%                                                       | 18.75                                                      | 00:17:52                                                     | 0.00%                                                      | 0 (0.00%)                                        | \$0.00 (0.00%)                                             |
| 16. <a href="#">it</a>     | <b>10,426</b> (0.68%)                                                  | 48.27%                                                       | 5,033 (1.07%)                                                  | 46.26%                                                       | 6.77                                                       | 00:06:10                                                     | 0.00%                                                      | 0 (0.00%)                                        | \$0.00 (0.00%)                                             |
| 17. <a href="#">nl</a>     | <b>10,387</b> (0.67%)                                                  | 43.14%                                                       | 4,481 (0.95%)                                                  | 45.80%                                                       | 8.22                                                       | 00:07:38                                                     | 0.00%                                                      | 0 (0.00%)                                        | \$0.00 (0.00%)                                             |
| 18. <a href="#">ko</a>     | <b>10,267</b> (0.66%)                                                  | 27.53%                                                       | 2,826 (0.60%)                                                  | 26.78%                                                       | 12.14                                                      | 00:14:30                                                     | 0.00%                                                      | 0 (0.00%)                                        | \$0.00 (0.00%)                                             |
| 19. <a href="#">pl</a>     | <b>10,121</b> (0.66%)                                                  | 34.86%                                                       | 3,528 (0.75%)                                                  | 48.35%                                                       | 9.72                                                       | 00:08:42                                                     | 0.00%                                                      | 0 (0.00%)                                        | \$0.00 (0.00%)                                             |
| 20. <a href="#">fr-fr</a>  | <b>8,270</b> (0.54%)                                                   | 24.67%                                                       | 2,040 (0.43%)                                                  | 53.80%                                                       | 6.30                                                       | 00:05:49                                                     | 0.00%                                                      | 0 (0.00%)                                        | \$0.00 (0.00%)                                             |
| 21. <a href="#">cs</a>     | <b>8,091</b> (0.52%)                                                   | 33.27%                                                       | 2,692 (0.57%)                                                  | 43.65%                                                       | 7.84                                                       | 00:07:29                                                     | 0.00%                                                      | 0 (0.00%)                                        | \$0.00 (0.00%)                                             |
| 22. <a href="#">es-ar</a>  | <b>7,697</b> (0.50%)                                                   | 29.34%                                                       | 2,258 (0.48%)                                                  | 21.28%                                                       | 13.50                                                      | 00:14:14                                                     | 0.00%                                                      | 0 (0.00%)                                        | \$0.00 (0.00%)                                             |
| 23. <a href="#">it-it</a>  | <b>4,443</b> (0.29%)                                                   | 46.05%                                                       | 2,046 (0.43%)                                                  | 46.66%                                                       | 6.97                                                       | 00:05:27                                                     | 0.00%                                                      | 0 (0.00%)                                        | \$0.00 (0.00%)                                             |
| 24. <a href="#">ru-ru</a>  | <b>4,193</b> (0.27%)                                                   | 31.96%                                                       | 1,340 (0.28%)                                                  | 45.53%                                                       | 6.77                                                       | 00:06:13                                                     | 0.00%                                                      | 0 (0.00%)                                        | \$0.00 (0.00%)                                             |
| 25. <a href="#">sv-se</a>  | <b>4,078</b> (0.26%)                                                   | 17.02%                                                       | 694 (0.15%)                                                    | 38.38%                                                       | 6.35                                                       | 00:08:14                                                     | 0.00%                                                      | 0 (0.00%)                                        | \$0.00 (0.00%)                                             |
| 26. <a href="#">tr</a>     | <b>3,972</b> (0.26%)                                                   | 49.62%                                                       | 1,971 (0.42%)                                                  | 43.30%                                                       | 7.12                                                       | 00:06:26                                                     | 0.00%                                                      | 0 (0.00%)                                        | \$0.00 (0.00%)                                             |

| Global Performance Report - Q3 2023 |           |                   |             |                   |                     |                   |                |                   |            |                |   |         |        |         |
|-------------------------------------|-----------|-------------------|-------------|-------------------|---------------------|-------------------|----------------|-------------------|------------|----------------|---|---------|--------|---------|
| ID                                  | Region    | Sales Performance |             |                   | Operational Metrics |                   |                | Financial Summary |            |                |   |         |        |         |
|                                     |           | Units Sold        | Revenue (M) | Profit Margin (%) | Efficiency Score    | Customer Sat. (%) | Churn Rate (%) | Revenue (M)       | Profit (M) | Net Income (M) |   |         |        |         |
| 27.                                 | sk        | 3,546             | (0.23%)     | 18.50%            | 656                 | (0.14%)           | 37.08%         | 8.66              | 00:09:12   | 0.00%          | 0 | (0.00%) | \$0.00 | (0.00%) |
| 28.                                 | sv        | 3,429             | (0.22%)     | 32.93%            | 1,129               | (0.24%)           | 35.23%         | 8.18              | 00:11:04   | 0.00%          | 0 | (0.00%) | \$0.00 | (0.00%) |
| 29.                                 | pt-pt     | 3,289             | (0.21%)     | 39.50%            | 1,299               | (0.27%)           | 39.65%         | 8.01              | 00:08:11   | 0.00%          | 0 | (0.00%) | \$0.00 | (0.00%) |
| 30.                                 | pt        | 2,267             | (0.15%)     | 48.21%            | 1,093               | (0.23%)           | 34.94%         | 17.04             | 00:14:23   | 0.00%          | 0 | (0.00%) | \$0.00 | (0.00%) |
| 31.                                 | ja-jp     | 2,097             | (0.14%)     | 21.41%            | 449                 | (0.10%)           | 43.68%         | 5.03              | 00:04:39   | 0.00%          | 0 | (0.00%) | \$0.00 | (0.00%) |
| 32.                                 | da        | 1,950             | (0.13%)     | 47.74%            | 931                 | (0.20%)           | 46.82%         | 5.91              | 00:05:29   | 0.00%          | 0 | (0.00%) | \$0.00 | (0.00%) |
| 33.                                 | id        | 1,561             | (0.10%)     | 58.74%            | 917                 | (0.19%)           | 57.72%         | 5.61              | 00:06:34   | 0.00%          | 0 | (0.00%) | \$0.00 | (0.00%) |
| 34.                                 | ko-kr     | 1,456             | (0.09%)     | 7.83%             | 114                 | (0.02%)           | 24.31%         | 20.29             | 00:22:08   | 0.00%          | 0 | (0.00%) | \$0.00 | (0.00%) |
| 35.                                 | hu        | 1,453             | (0.09%)     | 58.29%            | 847                 | (0.18%)           | 64.35%         | 3.26              | 00:02:56   | 0.00%          | 0 | (0.00%) | \$0.00 | (0.00%) |
| 36.                                 | th        | 1,359             | (0.09%)     | 45.33%            | 616                 | (0.13%)           | 58.13%         | 5.12              | 00:04:46   | 0.00%          | 0 | (0.00%) | \$0.00 | (0.00%) |
| 37.                                 | es-la     | 1,352             | (0.09%)     | 15.24%            | 206                 | (0.04%)           | 43.71%         | 9.45              | 00:08:48   | 0.00%          | 0 | (0.00%) | \$0.00 | (0.00%) |
| 38.                                 | vi        | 1,218             | (0.08%)     | 46.22%            | 563                 | (0.12%)           | 40.97%         | 7.97              | 00:08:42   | 0.00%          | 0 | (0.00%) | \$0.00 | (0.00%) |
| 39.                                 | es-xl     | 1,026             | (0.07%)     | 6.24%             | 64                  | (0.01%)           | 86.84%         | 2.68              | 00:01:31   | 0.00%          | 0 | (0.00%) | \$0.00 | (0.00%) |
| 40.                                 | es-cl     | 973               | (0.06%)     | 38.64%            | 376                 | (0.08%)           | 32.37%         | 8.17              | 00:08:08   | 0.00%          | 0 | (0.00%) | \$0.00 | (0.00%) |
| 41.                                 | fi-fi     | 932               | (0.06%)     | 36.91%            | 344                 | (0.07%)           | 34.76%         | 8.08              | 00:10:34   | 0.00%          | 0 | (0.00%) | \$0.00 | (0.00%) |
| 42.                                 | el        | 921               | (0.06%)     | 63.74%            | 587                 | (0.12%)           | 62.65%         | 4.06              | 00:02:39   | 0.00%          | 0 | (0.00%) | \$0.00 | (0.00%) |
| 43.                                 | ca        | 871               | (0.06%)     | 49.25%            | 429                 | (0.09%)           | 35.13%         | 8.38              | 00:07:30   | 0.00%          | 0 | (0.00%) | \$0.00 | (0.00%) |
| 44.                                 | fi        | 838               | (0.05%)     | 43.20%            | 362                 | (0.08%)           | 48.57%         | 7.98              | 00:04:12   | 0.00%          | 0 | (0.00%) | \$0.00 | (0.00%) |
| 45.                                 | hu-hu     | 823               | (0.05%)     | 67.19%            | 553                 | (0.12%)           | 68.65%         | 2.69              | 00:01:47   | 0.00%          | 0 | (0.00%) | \$0.00 | (0.00%) |
| 46.                                 | th-th     | 780               | (0.05%)     | 28.97%            | 226                 | (0.05%)           | 37.44%         | 6.72              | 00:07:26   | 0.00%          | 0 | (0.00%) | \$0.00 | (0.00%) |
| 47.                                 | tr-tr     | 755               | (0.05%)     | 36.42%            | 275                 | (0.06%)           | 54.04%         | 5.49              | 00:05:27   | 0.00%          | 0 | (0.00%) | \$0.00 | (0.00%) |
| 48.                                 | nl-nl     | 748               | (0.05%)     | 46.26%            | 346                 | (0.07%)           | 74.20%         | 3.63              | 00:01:39   | 0.00%          | 0 | (0.00%) | \$0.00 | (0.00%) |
| 49.                                 | it        | 742               | (0.05%)     | 31.54%            | 234                 | (0.05%)           | 41.78%         | 8.24              | 00:10:11   | 0.00%          | 0 | (0.00%) | \$0.00 | (0.00%) |
| 50.                                 | en-au     | 688               | (0.04%)     | 17.30%            | 119                 | (0.03%)           | 22.09%         | 7.23              | 00:10:05   | 0.00%          | 0 | (0.00%) | \$0.00 | (0.00%) |
| 51.                                 | no        | 672               | (0.04%)     | 34.23%            | 230                 | (0.05%)           | 42.11%         | 5.43              | 00:04:20   | 0.00%          | 0 | (0.00%) | \$0.00 | (0.00%) |
| 52.                                 | ar        | 630               | (0.04%)     | 45.71%            | 288                 | (0.06%)           | 52.54%         | 4.98              | 00:06:06   | 0.00%          | 0 | (0.00%) | \$0.00 | (0.00%) |
| 53.                                 | zh-hk     | 628               | (0.04%)     | 28.82%            | 181                 | (0.04%)           | 35.19%         | 6.02              | 00:04:40   | 0.00%          | 0 | (0.00%) | \$0.00 | (0.00%) |
| 54.                                 | bg        | 581               | (0.04%)     | 64.54%            | 375                 | (0.08%)           | 73.67%         | 2.59              | 00:01:33   | 0.00%          | 0 | (0.00%) | \$0.00 | (0.00%) |
| 55.                                 | et        | 578               | (0.04%)     | 41.87%            | 242                 | (0.05%)           | 44.12%         | 4.97              | 00:04:12   | 0.00%          | 0 | (0.00%) | \$0.00 | (0.00%) |
| 56.                                 | nb-no     | 555               | (0.04%)     | 33.87%            | 188                 | (0.04%)           | 36.58%         | 7.68              | 00:08:00   | 0.00%          | 0 | (0.00%) | \$0.00 | (0.00%) |
| 57.                                 | fr-ca     | 549               | (0.04%)     | 6.92%             | 38                  | (0.01%)           | 10.56%         | 73.35             | 01:00:06   | 0.00%          | 0 | (0.00%) | \$0.00 | (0.00%) |
| 58.                                 | el-gr     | 496               | (0.03%)     | 61.29%            | 304                 | (0.06%)           | 58.67%         | 4.39              | 00:03:26   | 0.00%          | 0 | (0.00%) | \$0.00 | (0.00%) |
| 59.                                 | vi-vn     | 431               | (0.03%)     | 46.40%            | 200                 | (0.04%)           | 49.88%         | 5.44              | 00:04:32   | 0.00%          | 0 | (0.00%) | \$0.00 | (0.00%) |
| 60.                                 | he        | 426               | (0.03%)     | 72.54%            | 309                 | (0.07%)           | 56.57%         | 4.27              | 00:02:28   | 0.00%          | 0 | (0.00%) | \$0.00 | (0.00%) |
| 61.                                 | ro        | 389               | (0.03%)     | 70.95%            | 276                 | (0.06%)           | 70.44%         | 2.51              | 00:01:30   | 0.00%          | 0 | (0.00%) | \$0.00 | (0.00%) |
| 62.                                 | fil       | 358               | (0.02%)     | 72.63%            | 260                 | (0.06%)           | 62.85%         | 2.78              | 00:02:12   | 0.00%          | 0 | (0.00%) | \$0.00 | (0.00%) |
| 63.                                 | sl        | 339               | (0.02%)     | 70.50%            | 239                 | (0.05%)           | 75.52%         | 2.61              | 00:00:57   | 0.00%          | 0 | (0.00%) | \$0.00 | (0.00%) |
| 64.                                 | da-dk     | 320               | (0.02%)     | 39.06%            | 125                 | (0.03%)           | 79.69%         | 2.10              | 00:01:29   | 0.00%          | 0 | (0.00%) | \$0.00 | (0.00%) |
| 65.                                 | uk        | 315               | (0.02%)     | 55.87%            | 176                 | (0.04%)           | 54.92%         | 4.40              | 00:05:00   | 0.00%          | 0 | (0.00%) | \$0.00 | (0.00%) |
| 66.                                 | ja-jp-mac | 313               | (0.02%)     | 32.59%            | 102                 | (0.02%)           | 28.12%         | 9.31              | 00:06:28   | 0.00%          | 0 | (0.00%) | \$0.00 | (0.00%) |

|      |                              |                    |        |             |        |       |          |       |           |                |
|------|------------------------------|--------------------|--------|-------------|--------|-------|----------|-------|-----------|----------------|
| 67.  | <a href="#">de-at</a>        | <b>301</b> (0.02%) | 45.51% | 137 (0.03%) | 16.28% | 8.28  | 00:08:02 | 0.00% | 0 (0.00%) | \$0.00 (0.00%) |
| 68.  | <a href="#">ro-ro</a>        | <b>296</b> (0.02%) | 35.14% | 104 (0.02%) | 45.27% | 12.60 | 00:10:57 | 0.00% | 0 (0.00%) | \$0.00 (0.00%) |
| 69.  | <a href="#">es-co</a>        | <b>295</b> (0.02%) | 12.20% | 36 (0.01%)  | 73.56% | 7.82  | 00:05:40 | 0.00% | 0 (0.00%) | \$0.00 (0.00%) |
| 70.  | <a href="#">ar-sa</a>        | <b>251</b> (0.02%) | 78.09% | 196 (0.04%) | 68.13% | 2.37  | 00:01:26 | 0.00% | 0 (0.00%) | \$0.00 (0.00%) |
| 71.  | <a href="#">lv</a>           | <b>206</b> (0.01%) | 71.84% | 148 (0.03%) | 77.18% | 1.86  | 00:00:52 | 0.00% | 0 (0.00%) | \$0.00 (0.00%) |
| 72.  | <a href="#">sr</a>           | <b>205</b> (0.01%) | 72.68% | 149 (0.03%) | 74.63% | 1.64  | 00:01:02 | 0.00% | 0 (0.00%) | \$0.00 (0.00%) |
| 73.  | <a href="#">hr</a>           | <b>202</b> (0.01%) | 78.22% | 158 (0.03%) | 67.33% | 2.95  | 00:01:55 | 0.00% | 0 (0.00%) | \$0.00 (0.00%) |
| 74.  | <a href="#">es-pe</a>        | <b>198</b> (0.01%) | 7.58%  | 15 (0.00%)  | 11.11% | 11.24 | 00:09:43 | 0.00% | 0 (0.00%) | \$0.00 (0.00%) |
| 75.  | <a href="#">hr-hr</a>        | <b>190</b> (0.01%) | 78.95% | 150 (0.03%) | 38.95% | 4.31  | 00:02:31 | 0.00% | 0 (0.00%) | \$0.00 (0.00%) |
| 76.  | <a href="#">nb</a>           | <b>171</b> (0.01%) | 52.63% | 90 (0.02%)  | 48.54% | 5.29  | 00:03:45 | 0.00% | 0 (0.00%) | \$0.00 (0.00%) |
| 77.  | <a href="#">es-us</a>        | <b>168</b> (0.01%) | 39.29% | 66 (0.01%)  | 14.29% | 9.01  | 00:07:37 | 0.00% | 0 (0.00%) | \$0.00 (0.00%) |
| 78.  | <a href="#">en-za</a>        | <b>129</b> (0.01%) | 75.19% | 97 (0.02%)  | 63.57% | 2.38  | 00:01:42 | 0.00% | 0 (0.00%) | \$0.00 (0.00%) |
| 79.  | <a href="#">(not set)</a>    | <b>124</b> (0.01%) | 67.74% | 84 (0.02%)  | 42.74% | 7.81  | 00:06:20 | 0.00% | 0 (0.00%) | \$0.00 (0.00%) |
| 80.  | <a href="#">pl-pl</a>        | <b>114</b> (0.01%) | 59.65% | 68 (0.01%)  | 66.67% | 23.61 | 00:04:47 | 0.00% | 0 (0.00%) | \$0.00 (0.00%) |
| 81.  | <a href="#">es-bo</a>        | <b>112</b> (0.01%) | 0.89%  | 1 (0.00%)   | 10.71% | 49.59 | 00:31:36 | 0.00% | 0 (0.00%) | \$0.00 (0.00%) |
| 82.  | <a href="#">en-in</a>        | <b>98</b> (0.01%)  | 94.90% | 93 (0.02%)  | 65.31% | 1.63  | 00:00:42 | 0.00% | 0 (0.00%) | \$0.00 (0.00%) |
| 83.  | <a href="#">fa</a>           | <b>90</b> (0.01%)  | 42.22% | 38 (0.01%)  | 67.78% | 2.20  | 00:03:03 | 0.00% | 0 (0.00%) | \$0.00 (0.00%) |
| 84.  | <a href="#">en-ca</a>        | <b>84</b> (0.01%)  | 71.43% | 60 (0.01%)  | 53.57% | 6.23  | 00:02:14 | 0.00% | 0 (0.00%) | \$0.00 (0.00%) |
| 85.  | <a href="#">es-ve</a>        | <b>74</b> (0.00%)  | 44.59% | 33 (0.01%)  | 27.03% | 7.68  | 00:10:50 | 0.00% | 0 (0.00%) | \$0.00 (0.00%) |
| 86.  | <a href="#">c</a>            | <b>70</b> (0.00%)  | 98.57% | 69 (0.01%)  | 95.71% | 1.09  | 00:00:06 | 0.00% | 0 (0.00%) | \$0.00 (0.00%) |
| 87.  | <a href="#">de-ch</a>        | <b>69</b> (0.00%)  | 34.78% | 24 (0.01%)  | 46.38% | 17.45 | 00:05:46 | 0.00% | 0 (0.00%) | \$0.00 (0.00%) |
| 88.  | <a href="#">en-us.en</a>     | <b>66</b> (0.00%)  | 1.52%  | 1 (0.00%)   | 95.45% | 1.20  | 00:00:11 | 0.00% | 0 (0.00%) | \$0.00 (0.00%) |
| 89.  | <a href="#">en_us</a>        | <b>62</b> (0.00%)  | 93.55% | 58 (0.01%)  | 67.74% | 2.10  | 00:01:11 | 0.00% | 0 (0.00%) | \$0.00 (0.00%) |
| 90.  | <a href="#">cs-cz</a>        | <b>56</b> (0.00%)  | 92.86% | 52 (0.01%)  | 73.21% | 2.96  | 00:01:14 | 0.00% | 0 (0.00%) | \$0.00 (0.00%) |
| 91.  | <a href="#">es-uy</a>        | <b>48</b> (0.00%)  | 62.50% | 30 (0.01%)  | 22.92% | 12.88 | 00:11:32 | 0.00% | 0 (0.00%) | \$0.00 (0.00%) |
| 92.  | <a href="#">en_gb</a>        | <b>42</b> (0.00%)  | 92.86% | 39 (0.01%)  | 73.81% | 3.00  | 00:03:34 | 0.00% | 0 (0.00%) | \$0.00 (0.00%) |
| 93.  | <a href="#">ca-es</a>        | <b>41</b> (0.00%)  | 48.78% | 20 (0.00%)  | 46.34% | 3.90  | 00:01:33 | 0.00% | 0 (0.00%) | \$0.00 (0.00%) |
| 94.  | <a href="#">fr-ch</a>        | <b>32</b> (0.00%)  | 46.88% | 15 (0.00%)  | 53.12% | 3.31  | 00:03:09 | 0.00% | 0 (0.00%) | \$0.00 (0.00%) |
| 95.  | <a href="#">fa-ir</a>        | <b>26</b> (0.00%)  | 69.23% | 18 (0.00%)  | 73.08% | 3.65  | 00:01:36 | 0.00% | 0 (0.00%) | \$0.00 (0.00%) |
| 96.  | <a href="#">en-nz</a>        | <b>24</b> (0.00%)  | 62.50% | 15 (0.00%)  | 79.17% | 2.08  | 00:00:29 | 0.00% | 0 (0.00%) | \$0.00 (0.00%) |
| 97.  | <a href="#">es-cr</a>        | <b>23</b> (0.00%)  | 91.30% | 21 (0.00%)  | 39.13% | 6.96  | 00:04:20 | 0.00% | 0 (0.00%) | \$0.00 (0.00%) |
| 98.  | <a href="#">es-es_tradnl</a> | <b>22</b> (0.00%)  | 31.82% | 7 (0.00%)   | 22.73% | 8.50  | 00:09:18 | 0.00% | 0 (0.00%) | \$0.00 (0.00%) |
| 99.  | <a href="#">eu</a>           | <b>22</b> (0.00%)  | 63.64% | 14 (0.00%)  | 77.27% | 5.59  | 00:08:13 | 0.00% | 0 (0.00%) | \$0.00 (0.00%) |
| 100. | <a href="#">gl-gl</a>        | <b>22</b> (0.00%)  | 54.55% | 12 (0.00%)  | 45.45% | 5.00  | 00:04:55 | 0.00% | 0 (0.00%) | \$0.00 (0.00%) |
